# Supplementary material for: Kinetic Analysis of the Reaction between Tannic Acid (TA) and L-Lysine Diisocyanate (LDI) Systems
Source: Hindawi journal article supplement (doi:10.1155/2023/6616752), 2023-11-22
Supplement: f1 [file 6616752.f1.zip]

Archive with 9 entries (9 files):
- f.txt
- minii.txt
- programvya.txt
- programvyam.txt
- rk45.txt
- rk451.txt
- rk455.txt
- Supporting information.docx
- Vay2.txt
