# Supplementary material for: Kinetic Analysis of the Reaction between Tannic Acid (TA) and L-Lysine Diisocyanate (LDI) Systems
Source: Hindawi journal article supplement (doi:10.1155/2023/6616752), 2023-11-22
Supplement: f1 [file 6616752.f1.zip › f.txt]

function v = f(t,y,m,n,E,A,bet)


v = A./bet.*exp(-1000* E./(8.314.*t)).*y.^m.*(1-y).^n;
end
