# Supplementary material for: Kinetic Analysis of the Reaction between Tannic Acid (TA) and L-Lysine Diisocyanate (LDI) Systems
Source: Hindawi journal article supplement (doi:10.1155/2023/6616752), 2023-11-22
Supplement: f1 [file 6616752.f1.zip › minii.txt]

function minimalo=minii(dadtexp,alff,T,Eav,Tmax,alffm,betas)
R=8.314;
Eave=Eav*1000;
xc = 0:0.01:3;
% minf=ones(length(xc),length(xc),length(xc));
% for i=1:length(alff1)
%    dadtexp=dadtexp1(i);
%     alff=alff1(i);
%    T=T1(i);
t = alff;

yy=dadtexp;
yyy=log(dadtexp)+Eave./(R.*T);
% axis([0 2 -0.5 6])
% hold on
% figure (1100)
% plot(t,y,'ro')
% title('Data points')
% itera=0;
% 
% F = @(x) -(-alffm.^(x(1)-1).*(1-alffm).^(x(2)-1).*(-log(1-alffm)).^(x(3)-1).*(log(1-alffm).*(x(1).*(alffm-1)+x(2).*alffm)+x(3).*alffm))./((alff.^x(1).*(1-alff).^x(2).*(-log(1-alff)).^x(3)));
% Fs = @(x)sum((F(x) - y).^2);
% lb=[0,1,1];
% ub=[1,2,3];
% A=[];
% b=[];
% Aeq=[];
% beq=[];
% x0 =[1,1,0];
% x=fmincon(Fs,x0,A,b,Aeq,beq,lb,ub)
% 
% hold on
% plot(t,F(x))
% hold off
% figure (1101)
% plot(t,yy,'ro')
% title('Data points')
% itera=0;
% 
%  F2= @(xx)(-Eave.*exp(Eave./(R.*Tmax))./(R.*Tmax.^2.*(-alffm.^(xx(1)-1).*(1-alffm).^(xx(2)-1).*(-log(1-alffm)).^(xx(3)-1).*(log(1-alffm).*(xx(1).*(alffm-1)+xx(2).*alffm)+xx(3).*alffm)))).*(exp(-Eave./(R.*T))).*(alff.^xx(1).*(1-alff).^xx(2).*(-log(1-alff)).^xx(3));
% F2s = @(xx)sum((F2(xx) - yy).^2);
% lb=[-1,-1,-1];
% ub=[3,3,3];
% A=[];
% b=[];
% Aeq=[];
% beq=[];
% xx0 = (lb+ub)/20;
% xx=fmincon(F2s,xx0,A,b,Aeq,beq,lb,ub)
% hold on
% plot(t,F2(x))
% hold off
figure (1102)
plot(t,yyy,'ro')
title('Data points')
itera=0;
 F3= @(xxx)xxx(4)+xxx(1).*log(alff)+xxx(2).*log(1-alff)+xxx(3).*log(-log(1-alff))
F3s = @(xxx)sum((F3(xxx) - yyy).^2);
lb=[0,0,-1,8];
ub=[1,3,3,16];
A=[];
b=[];
Aeq=[];
beq=[];
xxx0 = (lb+ub)/20;
xxx=fmincon(F3s,xxx0,A,b,Aeq,beq,lb,ub)
hold on
plot(t,F3(xxx),'*')

 F4= @(xxxx,alff)xxxx(4)+xxxx(1).*log(alff)+xxxx(2).*log(1-alff)+xxxx(3).*log(-log(1-alff))

xxxx0 = [1 1 1 0];

[xxxx,resnorm,~,exitflag,output] = lsqcurvefit(F4,xxxx0,t,yyy,lb,ub)

plot(t,F4(xxxx,alff))
%%%%%%%%%%%%
Ff=@(xxxx,alff) (alff.^xxxx(1).*(1-alff).^xxxx(2).*(-log(1-alff)).^xxxx(3))
%%%%%%%%%%%%%%%%%
 lb1=[0,0,-1];
ub1=[1,3,3];
y = betas.*Eave./(R.*Tmax.^2.*exp(xxxx(4))).*exp(Eave./(R.*Tmax));
yyyy=log(y);

F5 = @(xxxxx) log((alffm.^(xxxxx(1)-1).*(1-alffm).^(xxxxx(2)-1).*(-log(1-alffm)).^(xxxxx(3)-1).*(log(1-alffm).*(xxxxx(1).*(alffm-1)+xxxxx(2).*alffm)+xxxxx(3).*alffm)));
 F5s = @(xxxxx)sum((F5(xxxxx) - yyyy).^2);

A=[];
b=[];
Aeq=[];
beq=[];
xxxxx0 = (lb1+ub1)/20;
xxxxx=fmincon(F5s,xxxxx0,A,b,Aeq,beq,lb,ub)


%%%%%%%%%%%%%%%%%


%%%%%%%%%%%%%%%
xxxxxx=(xxxxx+xxxx(1:3))./2;

AA=[exp(xxxx(4)),0,0];

minimalo=[xxxx(1:3)',xxxxx',xxxxxx',AA'];
