# Supplementary material for: Kinetic Analysis of the Reaction between Tannic Acid (TA) and L-Lysine Diisocyanate (LDI) Systems
Source: Hindawi journal article supplement (doi:10.1155/2023/6616752), 2023-11-22
Supplement: f1 [file 6616752.f1.zip › programvyam.txt]

clc
clear
close all
Ea(1)=0;
R=8.314;
sd=0;sf=0;
betaas=[5,10,15,20];
expri_num=4;%5,10,15,20
for model='a':'e'
    iteration=0;
    sd=1+sd;
    
for betaa=5:5:20
    iteration=iteration+1

   


if betaa==20
num = xlsread( 'Sample2.xlsx','Sheet1' );numt=(num(1,1):0.1:num(end,1))';mnum=length(numt);  numh=spline(num(:,1),num(:,2),numt) ;Ht=trapz(numt,numh);[s,r]=max(numh); Tmax=numt(r,1);figure(1010);plot(numt,numh);  hold on
elseif betaa==15
num = xlsread( 'Sample2.xlsx','Sheet2' );numt=(num(1,1):0.1:num(end,1))';mnum=length(numt);  numh=spline(num(:,1),num(:,2),numt) ;Ht=trapz(numt,numh);[s,r]=max(numh); Tmax=numt(r,1);figure(1010);plot(numt,numh); hold on
elseif betaa==10
num = xlsread( 'Sample2.xlsx','Sheet3' );numt=(num(1,1):0.1:num(end,1))';mnum=length(numt);  numh=spline(num(:,1),num(:,2),numt) ;Ht=trapz(numt,numh);[s,r]=max(numh); Tmax=numt(r,1);figure(1010);plot(numt,numh);  hold on
elseif betaa==5
num = xlsread( 'Sample2.xlsx','Sheet4' );numt=(num(1,1):0.1:num(end,1))';mnum=length(numt); numh=spline(num(:,1),num(:,2),numt) ;Ht=trapz(numt,numh);[s,r]=max(numh); Tmax=numt(r,1);figure(1010);plot(numt,numh);  hold on
end
%alfa

alfaa=zeros(mnum,1);
dalfaadt=zeros(mnum,1);
for i=2:mnum
    alfaa(i)=trapz(numt(1:i),numh(1:i))/Ht;
end


% da/dt

 for j=2:mnum
dalfaadt(j) = (alfaa(j)-alfaa(j-1))/(numt(j)-numt(j-1));

end
%
numalfa=alfaa(:,1);
numdalfa=dalfaadt(:,1)
numtemp= numt;
alf=(0.1:0.01:0.9)';
numtempj=spline(numalfa,numtemp,alf)
numalfaj=alf;
numdalfaj=spline(numalfa,numdalfa,alf)
numHj=spline(numalfa,numh,alf)


xxGrid = alf';
n = length(xxGrid)-1;
%
%yeksansazi alfa
numtept(1,iteration)=numt(1);numtept(2,iteration)=numt(end);
%


numalfahame(:,iteration)=numalfaj; 
numdalfahame(:,iteration)=betaa.*numdalfaj;
numtemphame(:,iteration)=numtempj;
betanumtemp(:,iteration)=numtempj./betaa;
numHhame(:,iteration)=numHj;
[s,r]=max(numHhame(:,iteration));Tmax=numtemphame(r,iteration);
Tmaxx( iteration,1)=Tmax;
alfmax( iteration,1)=numalfahame(r,iteration);
%**************

    

figure(1);
plot(numtempj,numalfaj); hold on
plot(numtemp,numalfa,'o'); 

title('conversion')
xlabel('Temperature (0C)')
ylabel('alfa')
%8***************

figure(2)
plot(numalfaj,numdalfaj);hold on
plot(numalfa,numdalfa,'o')
title('Rate')
xlabel('Temperature (0C)')
ylabel('da/dt')
%8***************


    switch model
        case 'a'
    x=1000./(8.314.*numtempj);
    y=log(numdalfaj.*betaa);

        case 'b'
          
        x=1000./(8.314.*numtempj);
    y=log(betaa./numtempj.^2);
  
        case 'c'
        x=1050./(8.314*numtempj);
    y=log(betaa);
   
        case 'd'
        x=1000./(8.314*numtempj);
   y=log(betaa./numtempj.^1.95);
 
   case 'e'
       sf=1
    end
     X(:,iteration)=x;Y(:,iteration)=y;
end
if sf==0
    for i=1:length(numalfaj)
p1=polyfit(X(i,:),Y(i,:),1);
 y1=polyval(p1,X(i,:));
 figure(sd+2)
plot(X(i,:),Y(i,:),'o'); hold on
plot(X(i,:),y1,'k')
title('model')
xlabel('Temperature (0C)')
ylabel('alfa')


Ea(i,sd)=-p1(1);
lnafa(i,sd)=(p1(2));
afa(i,sd)=exp(lnafa(i,sd));
    end
end
   

end
switch model
    case 'e'
        for b=1:length(numtemphame)
        data=numtemphame(b,:)
        Ea(b,sd)=Vay2(data,betaas',expri_num)
        end
end
figure(10)
plot(numalfaj,Ea,'o') ; hold on
Eam=mean(Ea');
Eam=Eam';
pE = polyfit(numalfaj,Eam,5);
%%%%%%%%%
figure(31)
YE=polyval(pE,numalfaj);
plot(numalfaj,Eam); hold on
plot(numalfaj,YE,'^')
%%%%%5
   Eamm=mean(Eam);
   for h=1:expri_num
       alffm=alfmax(h,1);
       Tmasx=Tmaxx(h,1);
       Eave=Eam(5);
       alff=numalfahame(:,h);
       dadtexp=numdalfahame(:,h);
       Tm=numtemphame(:,h);
minimal=minii(dadtexp,alff,Tm,Eave,Tmasx,alffm,betaas(h));
m1(h)=minimal(1,1);
m2(h)=minimal(1,2);
m3(h)=minimal(1,3);
n1(h)=minimal(2,1);
n2(h)=minimal(2,2);
n3(h)=minimal(2,3);
p1(h)=minimal(3,1);
p2(h)=minimal(3,2);
p3(h)=minimal(3,3);
AA(h)=minimal(1,4);
   end
   pvay1=mean(p1); nvay1=mean(n1);mvay1=mean(m1);r1=[mvay1 nvay1 pvay1];
   pvay2=mean(p2); nvay2=mean(n2);mvay2=mean(m2);r2=[mvay2 nvay2 pvay2];
   pvay3=mean(p3); nvay3=mean(n3);mvay3=mean(m3);r3=[mvay3 nvay3 pvay3];
   

   Aavevay=mean(AA);
for tt=1:expri_num
    numtempjj=numtemphame(:,tt);
    numalfajj=numalfahame(:,tt);
    numdalfajj=numdalfahame(:,tt);
    betanumtempjj=betanumtemp(:,tt);
xi=1000*Eam./(8.314.*numtempjj);
Pii=(xi.^3+18.*xi.^2+88.*xi+96)./(xi.^4+20.*xi.^3+120.*xi.^2+240.*xi+120);
zalfa(:,tt)=Pii.*numdalfajj./betanumtempjj;
Zalfmax=max(zalfa(:,tt));
Zalfaa(:,tt)=zalfa(:,tt)./Zalfmax;
yalfa(:,tt)=numdalfajj.*exp(xi);
Yalfamax=max(yalfa(:,tt));
Yalfaa(:,tt)=yalfa(:,tt)./Yalfamax;
YY(:,tt)=log(numdalfajj)+xi;YYl(:,tt)=log(numdalfajj)+xi;
XX=log(1-numalfajj);
XXS=log(numalfajj); 
XXvay=(1-numalfajj);
XXSvay=(numalfajj);
YYchaco(:,tt)=log(numdalfajj)-2.*log(1-numalfajj);
XXchaco(:,tt)=1./numtempjj;
figure(26)
plot(numalfahame(:,tt),YYl(:,tt)); hold on

end

 figure(200)
plot(XXchaco(:,tt),YYchaco(:,tt)./betaas(tt),'-o'); hold on
p1=polyfit(XXchaco(:,tt),YYchaco(:,tt),1);
Eachaco(tt)=-R.*p1(1);
 y1=polyval(p1,XXchaco(:,tt));
 figure(sd+2)
plot(XXchaco(:,tt),YYchaco(:,tt),'o'); hold on
plot(XXchaco(:,tt),y1,'k')
title('model')
xlabel('Temperature (0C)')
ylabel('alfa')
figure(20)
plot(XX,YY,'o'); hold on

plot(XX,lnafa','-.') ;
figure(21)
plot(XX,YY,'o');


[m, gd] =max(Zalfaa)
alfinfp=numalfahame(gd,1);
alfinfave=mean(alfinfp);
figure(18)
plot(numalfajj,Zalfaa','o') ;

[mm, gmd] =max(Yalfaa)
alfm=numalfa(gmd,1);
alfmave=mean(alfm);
gamm=alfmave/(1-alfmave);
figure(17)
plot(numalfajj,Yalfaa','*') ;

for kk=1:expri_num
    numtempjj=numtemphame(:,kk);
    numalfajj=numalfahame(:,kk);
    numdalfajj=numdalfahame(:,kk);
   
Xberg(:,kk)=log(numalfajj.^gamm.*(1-numalfajj));
p3=polyfit(Xberg(:,kk),YY(:,kk),1);
n(kk)=p3(1);
m(kk)=p3(1)*gamm;
Am(kk)=exp(p3(2));

%%%%%%%%%%%%%%%%%%%%%%%%

%%%%%%%%%%%%%%%%%%%
Tmaxxx=Tmaxx(kk);
 att=alfmax(kk,1);
 bet1=betaas(kk)
lb1=[0,0,-1];
ub1=[1,3,3];
ff2=@(xt,at) log((Eamm.*1e3./(R.*Tmaxxx.^2).*exp(Eamm.*1e3./(R.*Tmaxxx))).*[-(at.^xt(1).*(-log(1 - at)).^x(3).*(1 - at).^xt(2))./(att.^xt(1).*xt(2).*(-log(1 - att)).^xt(3).*(1 - att).^(xt(2) - 1) - att.^(xt(1) - 1).*x(1).*(-log(1 - att)).^xt(3).*(1 - att).^xt(2) + (att.^xt(1).*xt(3).*(-log(1 - att)).^(xt(3) - 1).*(1 - att).^xt(2))./(att - 1))])
 
ff2s = @(xt,at)sum((ff2(xt,at) - YY(:,kk)).^2);


x0 = (lb1+ub1)./20;
[xmin2,resnorm,~,exitflag,output] = lsqcurvefit(ff2,x0,numalfahame(:,1),YY(:,kk),lb1,ub1)
powers(kk,:)=xmin2;
mpowerr=xmin2;
%%%%%%%%%%%%%%%%%%%%%%%%%
Qp=-(att.^mpowerr(1).*mpowerr(2).*(-log(1 - att)).^mpowerr(3).*(1 - att).^(mpowerr(2) - 1) - att.^(mpowerr(1) - 1).*mpowerr(1).*(-log(1 - att)).^mpowerr(3).*(1 - att).^mpowerr(2) + (att.^mpowerr(1).*mpowerr(3).*(-log(1 - att)).^(mpowerr(3) - 1).*(1 - att).^mpowerr(2))./(att - 1));
Amosh(kk)=bet1.*Eamm.*1e3.*exp(Eamm.*1e3./(R.*Tmaxxx))./(R.*Tmaxxx.^2.*Qp);


end
mpower=mean(powers);

Amean=mean(Amosh);
%%%%%%%%
nave=mean(n);
mave=mean(m);
r4=[mave,nave];
Aave=mean(Am);
Ynorder=nave.*XX(:,1)+log(Aave);
Yautoc=nave.*XX(:,1)+mave.*XXS(:,1)+log(Aave);
Yj=nvay1.*XX(:,1)+mvay1.*XXS(:,1)+log(Aavevay)+pvay1.*log(-XX(:,1));
Yjj=mpower(2).*XX(:,1)+mpower(1).*XXS(:,1)+log(Amean)+mpower(3).*log(-XX(:,1));
%%%%%%%%%%%%%%%%%%
for kk=1:expri_num
    numtempjj=numtemphame(:,kk);
    numalfajj=numalfahame(:,kk);
    numdalfajj=numdalfahame(:,kk);
   


%%%%%%%%%%%%%%%%%%%%%%%%

%%%%%%%%%%%%%%%%%%%

 bet1=betaas(kk)
lb1=[-1000,-1000,-1000,-1000,0,0];
ub1=[1000,1000,1000,1000,3,3];
ff23=@(xtl,at) xtl(1)+xtl(2).*at+xtl(3).*at.^2+xtl(4).*at.^3+xtl(5).*log(at)+xtl(6).*log(1-at);
 
 ff234=@(xtl) xtl(1)+xtl(2).*numalfajj+xtl(3).*numalfajj.^2+xtl(4).*numalfajj.^3+xtl(5).*log(numalfajj)+xtl(6).*log(1-numalfajj);


x0 = (lb1+ub1)./20;
[xmin22,resnorm,~,exitflag,output] = lsqcurvefit(ff23,x0,numalfajj,YYl(:,kk),lb1,ub1)
coeff(kk,:)=xmin22;
mmpowerr=xmin22;

%%%%%%%%%%%%%%%
ff234s = @(xt)sum((ff234(xt) - YY(:,kk)).^2);
bestx = fminsearch(ff234s,x0)

%%%%%%%%%%%%%%%%%%%%%%%%%
Aalf(:,kk)=exp(coeff(kk,1)+coeff(kk,2).*numalfajj+coeff(kk,3).*numalfajj.^2+coeff(kk,4).*numalfajj.^3);


YYYl(:,kk)=log(Aalf(:,kk))+coeff(kk,5).*log(numalfajj)+coeff(kk,6).*log(1-numalfajj);

end
coeifmean=mean(coeff);
Aalfm=mean(Aalf');
YYYYl=log(Aalfm')+mean(coeff(:,5)).*log(numalfajj)+mean(coeff(:,6)).*log(1-numalfajj);
r5=[coeifmean(5) coeifmean(6)];
%%%%%%%%%%%%%%%%%%%
pEA=polyfit(Eam,log(Aalfm)',1);
figure(310)
YEA=polyval(pEA,Eam);
plot(Eam,log(Aalfm)','o'); hold on
plot(Eam,YEA,'k')

%%%%%%%%%%%
figure(23)
plot(numalfajj,Aalfm); 
figure(24)

plot(numalfajj,Eam); 
%verificatin     YYl(:,tt)=log(numdalfajj)+;
figure(21)
plot(XX,YY,'o');hold on
plot(XX,Ynorder,'-r');plot(XX,Yautoc,'-k');
plot(XX,Yj,'-s');plot(XX,Yjj,'m');
plot(XX,YYYl,'y');
plot(XX,YYYYl,'b')
%%%%%%%%%%%%%


%%%%%%%%%%%%

Ff=@(xm,at) (at.^xm(1).*(1-at).^xm(2).*(-log(1-at)).^xm(3));
Ff2=@(xn,at) (at.^xn(1).*(1-at).^xn(2));

figure(2000)

plot(numalfahame(:,1),Ff(r1,numalfahame(:,1)),'*');hold on
plot(numalfahame(:,1),Ff(r2,numalfahame(:,1)),'s')

plot(numalfahame(:,1),Ff(r3,numalfahame(:,1)),'r')
plot(numalfahame(:,1),Ff2(r4,numalfahame(:,1)),'r')
plot(numalfahame(:,1),Ff2(r5,numalfahame(:,1)),'^')
%%%%%%%%%%%


for ver=1:expri_num
    figure(100)
    bet=betaas(ver);
    mc=coeff(ver,5);
    nc=coeff(ver,6);
    Ec=(Eam);
    Ac=Aalf(:,ver);
   Ti= numtemphame(1,ver);
    Tend= numtemphame(end,ver);
    aaal(1)=numalfahame (1,ver);
    for i=1:length(numtemphame(:,ver))-1
    v = @(tc,yc) Ac(i)./bet.*exp(-1000* Ec(i)./(8.314.*tc)).*yc.^mc.*(1-yc).^nc;
    tspan = [numtemphame(i,ver) numtemphame(i+1,ver)];
y0 = aaal(i);
[TT,alfaaa] = ode45(v, tspan, y0);
aaal(i+1)=alfaaa(end);
    end
plot(numtemphame(:,ver),aaal,'o',numtemphame(:,ver),numalfahame(:,ver),'-k'); hold on


title('Verificatin')
xlabel('Temperature (0C)')
ylabel('alfa')
end
