# Supplementary material for: Kinetic Analysis of the Reaction between Tannic Acid (TA) and L-Lysine Diisocyanate (LDI) Systems
Source: Hindawi journal article supplement (doi:10.1155/2023/6616752), 2023-11-22
Supplement: f1 [file 6616752.f1.zip › rk45.txt]

function [TT,alfaaa]=rk45

h = 1;
t = 310;
w = 0.003;
i = 1;

for aa=5:5:20
    h = 1;
t = 310;
w5= 0.003;
w10= 0.003;
w15= 0.003;
w20 = 0.003;
i=1;
if aa==5
while t<600 

k1 = h*f5(t,w5);
k2 = h*f5(t+h/2, w5+k1/2);
k3 = h*f5(t+h/2, w5+k2/2);
k4 = h*f5(t+h, w5+k3);
w15 = w5 + k1/6+k2/3+k3/3+k4/6;
T5(i)=t;
alfaa5(i)=w15
t = t+h;

w5 = w15;
i = i+1;


end

elseif aa==10


while t<600 

k1 = h*f10(t,w10);
k2 = h*f10(t+h/2, w10+k1/2);
k3 = h*f10(t+h/2, w10+k2/2);
k4 = h*f10(t+h, w10+k3);
w110 = w10 + k1/6+k2/3+k3/3+k4/6;
T10(i)=t;
alfaa10(i)=w110
t = t+h;

w10 = w110;
i = i+1;


end

elseif  aa==15
while t<600 

k1 = h*f15(t,w15);
k2 = h*f15(t+h/2, w15+k1/2);
k3 = h*f15(t+h/2, w15+k2/2);
k4 = h*f15(t+h, w15+k3);
w115 = w15 + k1/6+k2/3+k3/3+k4/6;
T15(i)=t;
alfaa15(i)=w115
t = t+h;

w15 = w115;
i = i+1;


end

elseif aa==20
while t<600 

k1 = h*f20(t,w20);
k2 = h*f20(t+h/2, w20+k1/2);
k3 = h*f20(t+h/2, w20+k2/2);
k4 = h*f20(t+h, w20+k3);
w120 = w20 + k1/6+k2/3+k3/3+k4/6;
T20(i)=t;
alfaa20(i)=w120
t = t+h;

w20 = w120;
i = i+1;

end

end
end

alfaaa=[alfaa20',alfaa15',alfaa10',alfaa5']
TT=[T20',T15',T10',T5'];


         


   
          

function v5 = f5(t,y)

A5= 2.1773e+05  
m5=0.4112
n5=  1.2549
v5 = A5/5*exp(-1000* 45.8782/(8.314*t))*y^m5*(1-y)^n5;
function v10 = f10(t,y)

A10= 2.1773e+05  

m10=0.4112
n10=  1.2549 
v10 = A10/10*exp(-1000* 45.8782/(8.314*t))*y^m10*(1-y)^n10;
function v15 = f15(t,y)
A15= 2.1773e+05  
m15=0.4112
n15=  1.2549

v15 = A15/15*exp(-1000* 45.8782/(8.314*t))*y^m15*(1-y)^n15;
function v20 = f20(t,y)
A20= 2.1773e+05   
m20=0.4112
n20=  1.2549

v20 = A20/20*exp(-1000* 45.8782/(8.314*t))*y^m20*(1-y)^n20;
