# Supplementary material for: Kinetic Analysis of the Reaction between Tannic Acid (TA) and L-Lysine Diisocyanate (LDI) Systems
Source: Hindawi journal article supplement (doi:10.1155/2023/6616752), 2023-11-22
Supplement: f1 [file 6616752.f1.zip › rk455.txt]

function [TT,alfaaa]=rk455(m,n,E,A,bet,Ti,Tend)

h = 1;
t = Ti;
w = 0.003;
i = 1;


while t<Tend

k1 = h*f(t,w,m,n,E,A,bet);
k2 = h*f(t+h/2, w+k1/2,m,n,E,A,bet);
k3 = h*f(t+h/2, w+k2/2,m,n,E,A,bet);
k4 = h*f(t+h, w+k3,m,n,E,A,bet);
w1 = w + k1/6+k2/3+k3/3+k4/6;
T(i)=t;
alfaa(i)=w1
t = t+h;

w = w1;
i = i+1;


end


alfaaa=[alfaa']
TT=[T];


        
