# Supplementary material for: Kinetic Analysis of the Reaction between Tannic Acid (TA) and L-Lysine Diisocyanate (LDI) Systems
Source: Hindawi journal article supplement (doi:10.1155/2023/6616752), 2023-11-22
Supplement: f1 [file 6616752.f1.zip › Supporting information.docx]

**Kinetic analysis of the reaction between of tannic acid (TA)/ L-lysine diisocyanate (LDI) system**

*Ali Karbasi 1 , Reza Darvishi1,*, Amirhossein Enayati Gerdroodbar 2 and Ghasem Payam 2*

*1 Polymer Engineering Department, Faculty of Petroleum and Gas (Gachsaran), Yasouj University, Gachsaran*

*2 Institute of Polymeric Materials, Faculty of Polymer Engineering, Sahand University of Technology, New Town of Sahand, Tabriz, Iran*

**** Correspondence: r.darvishi@yu.ac.ir***

**ATR-FTIR**

Figure 1 shows the Fourier transform infrared spectrum of the obtained polyurethane sample from TA and LDI. The absorption band at 3323 cm−1 corresponds to NH stretching. The sharp peaks at 2859 cm−1 and 2938 cm−1 are associated with −CH2stretching, while other modes of −CH2 vibrations are identified by the bands at 1464, 1418, 1364, and 1294 cm−1. In addition, the absorption band at 1734 cm−1 is associated with a C=O group in polyurethane. The group of NH vibrations is identified by the bands at 1541 cm−1. The band at 1720 cm−1 belongs to nonhydrogen-bonded carbonyl groups.


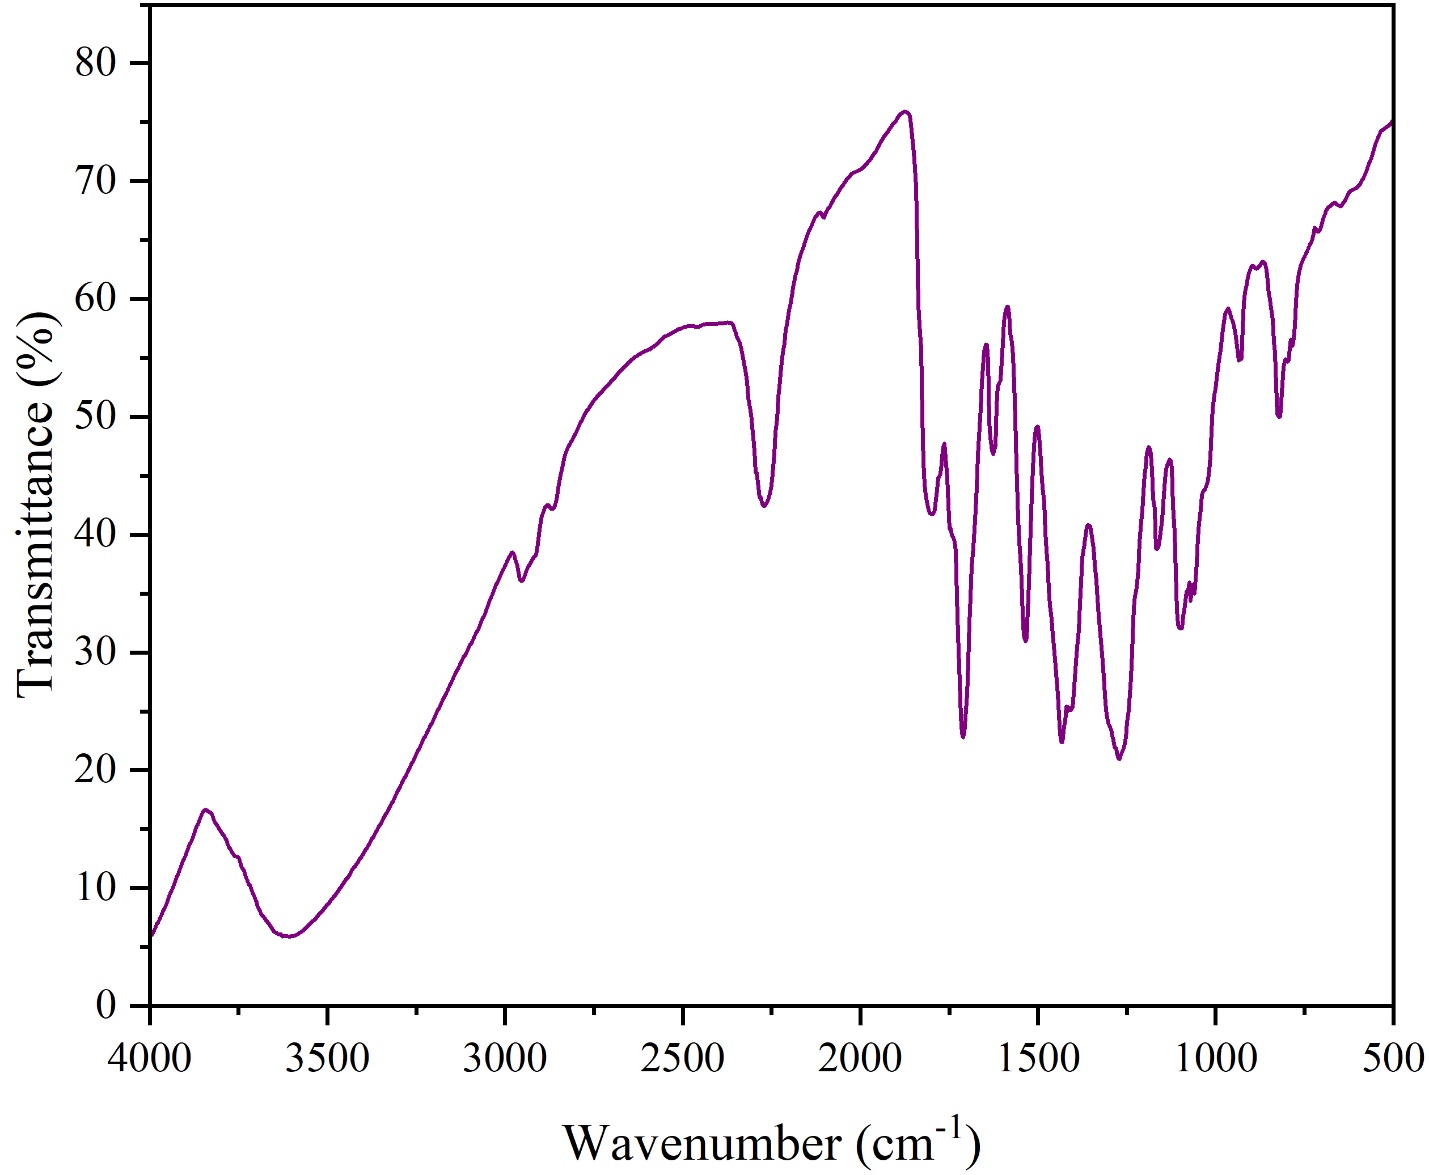


**Figure S1:** ATR-FTIR of TA/LDI Polyurethane.

**Figure S2:** FR ’s plot of dα/dt versus 1/T for GREEN POLYURETHAN AT ISOCONVERSION.

**Figure S3:** KAS ’s plot of ln(β/T2) versus 1/T for GREEN POLYURETHAN AT ISOCONVERSION.

**Figure S4:** OFW ’s plot of ln(β) versus 1.052/T for GREEN POLYURETHAN AT ISOCONVERSION.

**Figure S5:** Starink ’s plot of ln(β/T1.95) versus 1/T for GREEN POLYURETHAN AT ISOCONVERSION.
