# Supplementary material for: Kinetic Analysis of the Reaction between Tannic Acid (TA) and L-Lysine Diisocyanate (LDI) Systems
Source: Hindawi journal article supplement (doi:10.1155/2023/6616752), 2023-11-22
Supplement: f1 [file 6616752.f1.zip › Vay2.txt]

function Eaf=Vay(data,betas,n)
TT=data';
T0=0;
betaa=betas;
iter=0;
Eaa=20:0.1:70
for ks=1:length(Eaa)
    E=Eaa(ks).*1e3
    iter=iter+1;
summ=0;


for i=1:n
    for j=1:n 
        if j~=i
        summ=summ+(I(TT(i),E).*betas(j))./(I(TT(j),E).*betas(i));
        end
    end
end
SS(iter)=abs(n*(n-1)-summ);

end
figure(90)
plot(Eaa,SS)
[m,g]=min(SS);
Eaf=Eaa(g)
end


function y=I(T,E) %Function of calculating the integral value
% T and E is temperature and activation energy for a current
% alpha value, respectively
R=8.3144598;
y=E.*p(T,E)./R;
end
function y=p(T,E)
R=8.3144598;
x=E./(R.*T);
y=(exp(-x).*(x^3+18.*x.^2+88.*x+96))./(x.*(x.^4+20.*x.^3+120.*x.^2+240.*x+120));


end
